# Supplementary material for: BIAPSS: A Comprehensive Physicochemical Analyzer of Proteins Undergoing Liquid–Liquid Phase Separation
Source: MDPI journal article supplement (doi:10.3390/ijms23116204), 2022-05-31

# Supplementary Materials

## BIAPSS: A comprehensive physicochemical analyzer of proteins undergoing liquid-liquid phase separation

Aleksandra E. Badaczewska-Dawid <sup>1,\*</sup>, Vladimir N. Uversky <sup>2,\*</sup>, and Davit A. Potoyan <sup>1,3,4\*</sup>

- <sup>1</sup> Department of Chemistry, Iowa State University, Ames, IA50011, USA; [abadacz@iastate.edu](mailto:abadacz@iastate.edu) (A.E.B.-D.); [potoyan@iastate.edu](mailto:potoyan@iastate.edu) (D.A.P.)
- <sup>2</sup> Department of Molecular Medicine and USF Health Byrd Alzheimer's Research Institute, Morsani College of Medicine, University of South Florida, Tampa, FL 33612, USA; [vuversky@usf.edu](mailto:vuversky@usf.edu)
- <sup>3</sup> Bioinformatics and Computational Biology program, Iowa State University, Ames, IA 50011, USA
- <sup>4</sup> Department of Molecular Medicine and USF Health Byrd Alzheimer's Research Institute, Morsani College of Medicine, University of South Florida, Tampa, FL 33612;
- \* Correspondence: [abadacz@iastate.edu](mailto:abadacz@iastate.edu) (A.E.B.-D.), [vuversky@usf.edu](mailto:vuversky@usf.edu) (V.N.U.); [potoyan@iastate.edu](mailto:potoyan@iastate.edu) (D.A.P.)

The original results generated within BIAPSS web platform for FUS (UniProt identifier: P35637)

1.1 Entry Summary and Annotation web app: [https://biapss.chem.iastate.edu/single\\_seq.html](https://biapss.chem.iastate.edu/single_seq.html)

## Analysis of *Single* LLPS Sequence

Select UniProt ID

Select Name

Select Gene

Select Organism

Select from all deposits
 

1 501

P35637

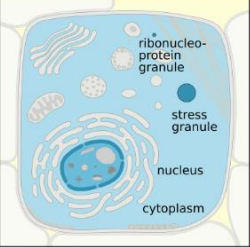

see cellular location at  
**COMPARTMENTS**

ORGANISM: Homo sapiens  
GENE: FUS  
NAME: RNA-binding protein FUS

| Parameter                       | Value                            |
|---------------------------------|----------------------------------|
| Sequence length:                | 526                              |
| LLPS fragment(s):               | 1-526 PMID:29961577              |
| LLPS PSPredictor <sup>↗</sup> : | 0.17 ( NO )                      |
| Disorder fraction:              | 0.84                             |
| Secondary structure:            | 0.08: 0.03 (H) 0.05 (E)          |
| Solvent accessibility:          | 0.08 (buried) 0.8 (exposed)      |
| Charge:                         | 0.17: 0.1 (pos) 0.07 (neg)       |
| Charge pattern:                 | 0.02 (FCR) 1.27 (OCS) 0.99 (SCD) |
| Polarity:                       | 0.4                              |
| Hydrophobicity:                 | 0.42                             |
| Aromatic:                       | 0.1                              |

CrossRefs

**PHASEPRO**

LLPSDB go

PHASEPDB go

**DRLLPS**

**DISPROT**

**UNIPROT**

STRUCTURE go

**CELLATLAS**

## 1.2 Sequence Complexity & Composition web app:

[https://biapss.chem.iastate.edu/single\\_seq.html#complexity](https://biapss.chem.iastate.edu/single_seq.html#complexity)

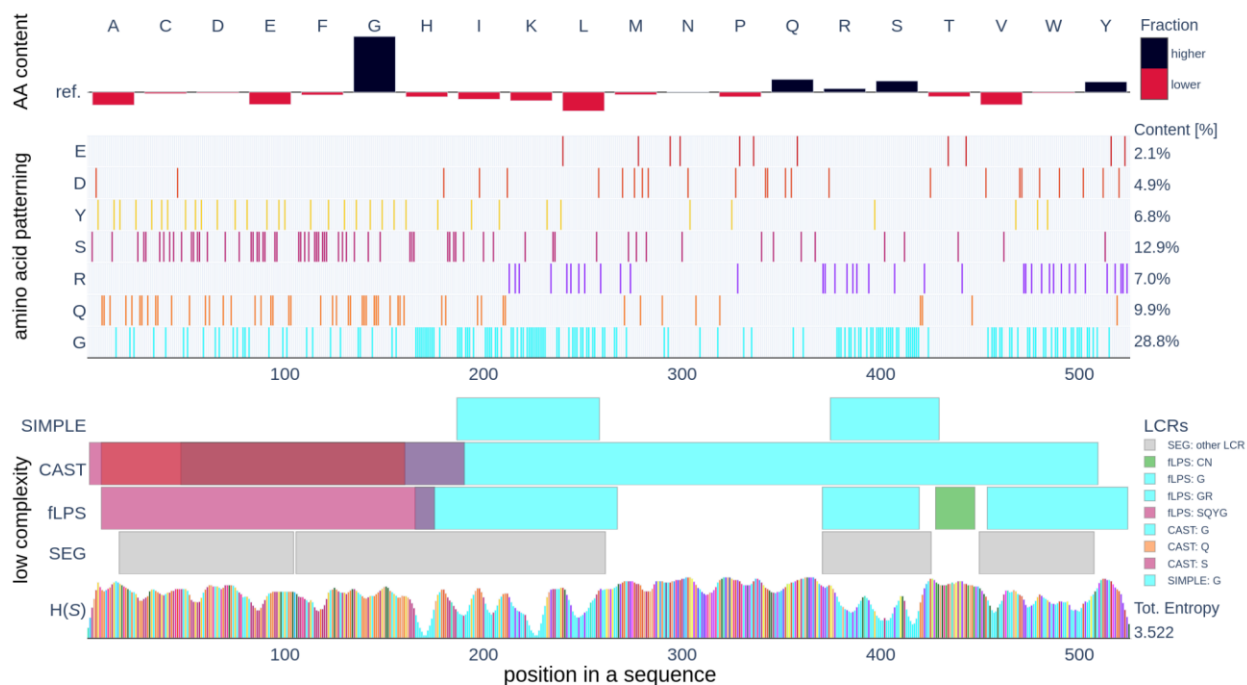

## 1.3 Patterns of Chemical Decoration web app: [https://biapss.chem.iastate.edu/single\\_seq.html#pattern](https://biapss.chem.iastate.edu/single_seq.html#pattern)

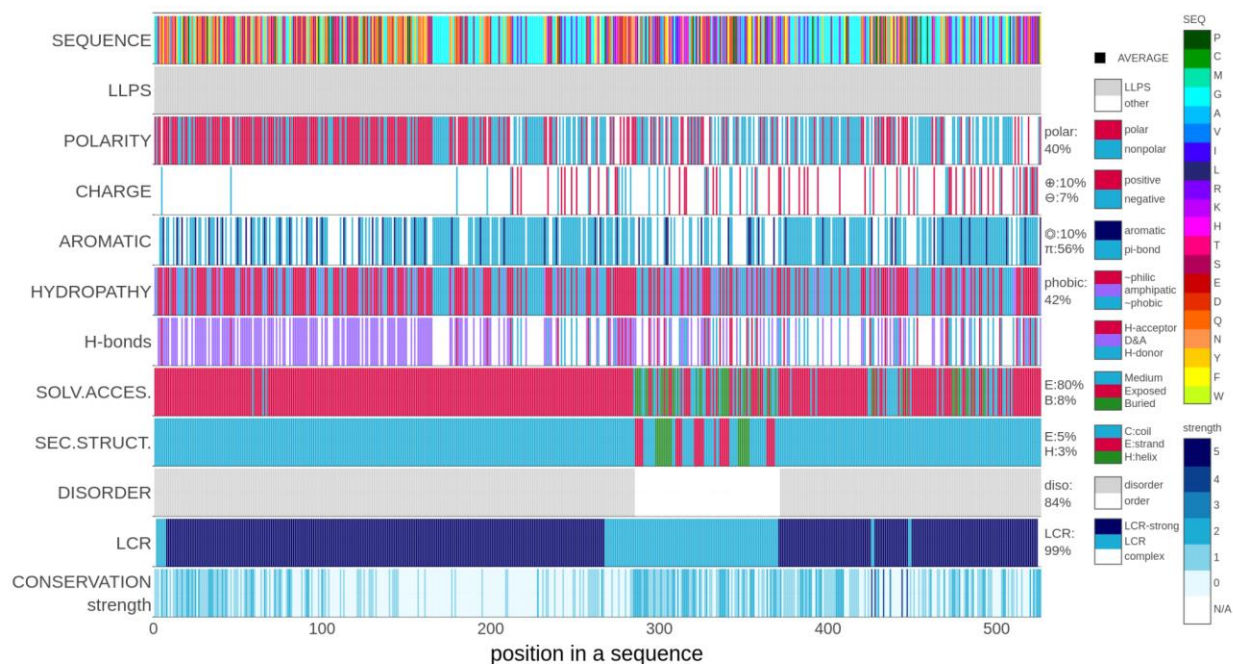

1.4 Domains, Motifs, Repeats web app: [https://biapss.chem.iastate.edu/single\\_seq.html#motifs](https://biapss.chem.iastate.edu/single_seq.html#motifs)

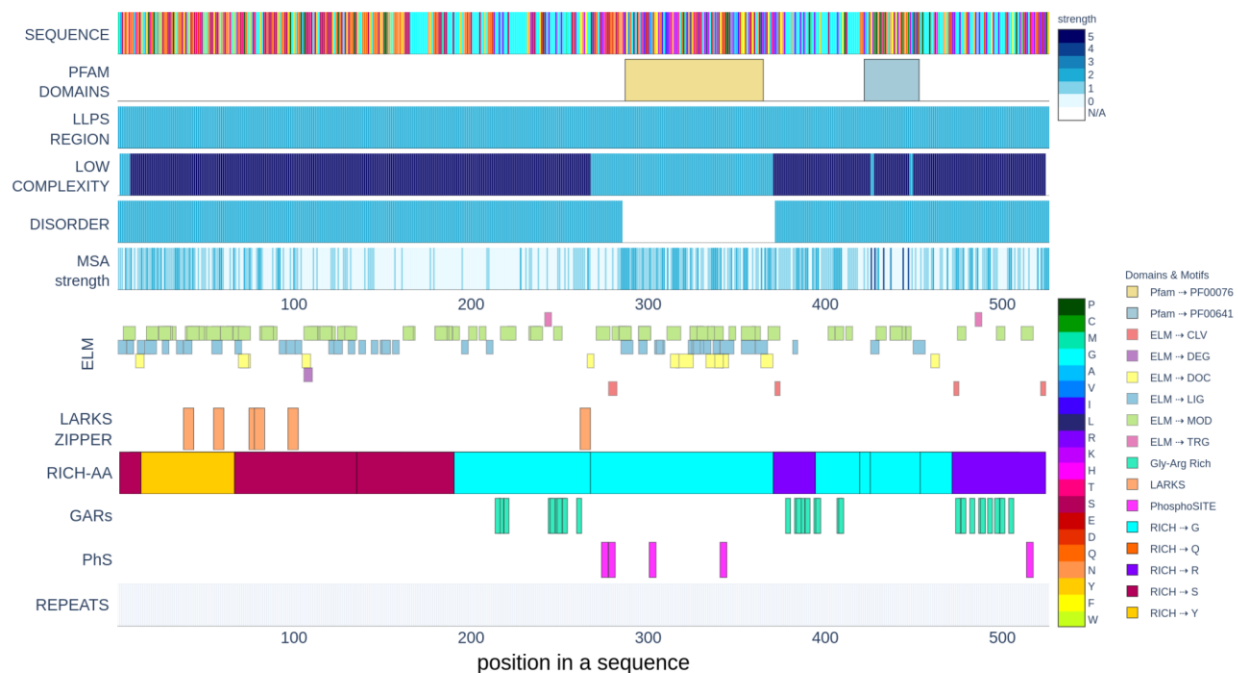

1.5 Sequence Conservation web app: [https://biapss.chem.iastate.edu/single\\_seq.html#conservation](https://biapss.chem.iastate.edu/single_seq.html#conservation)

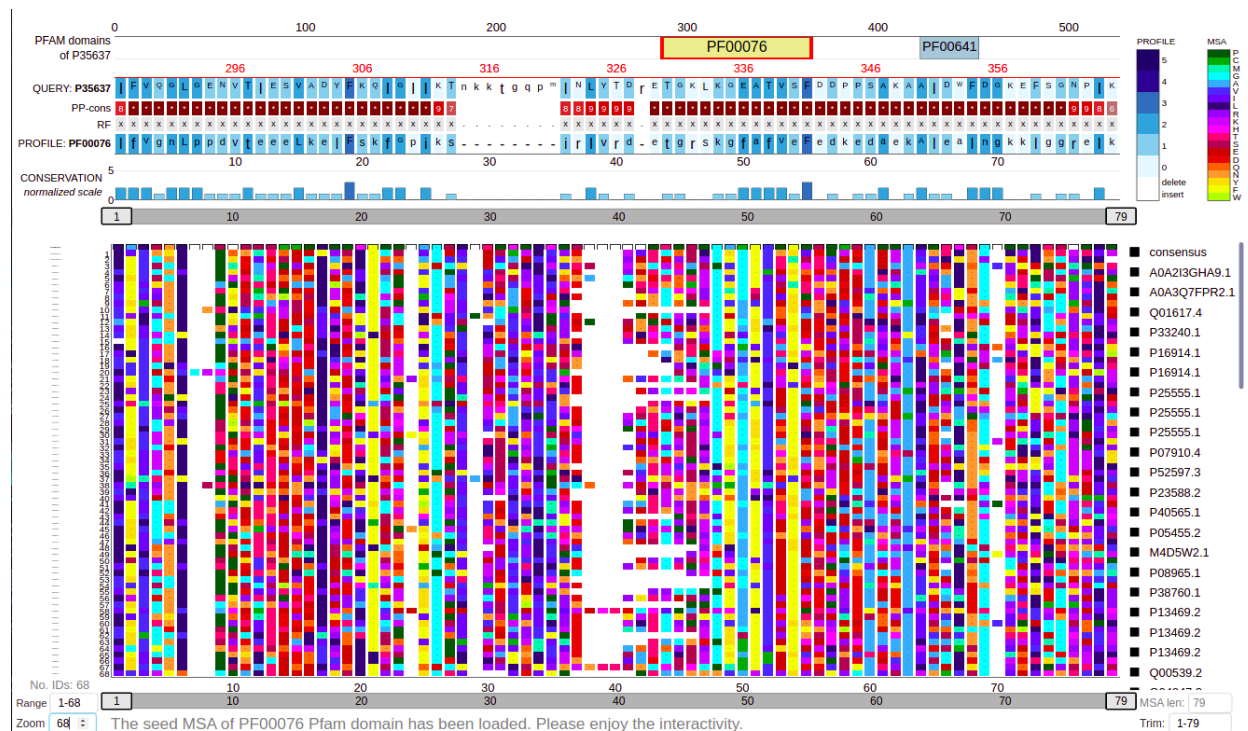

Domain PF00076



1.7 The Solvent Accessibility web app: [https://biapss.chem.iastate.edu/single\\_seq.html#solventacc](https://biapss.chem.iastate.edu/single_seq.html#solventacc)

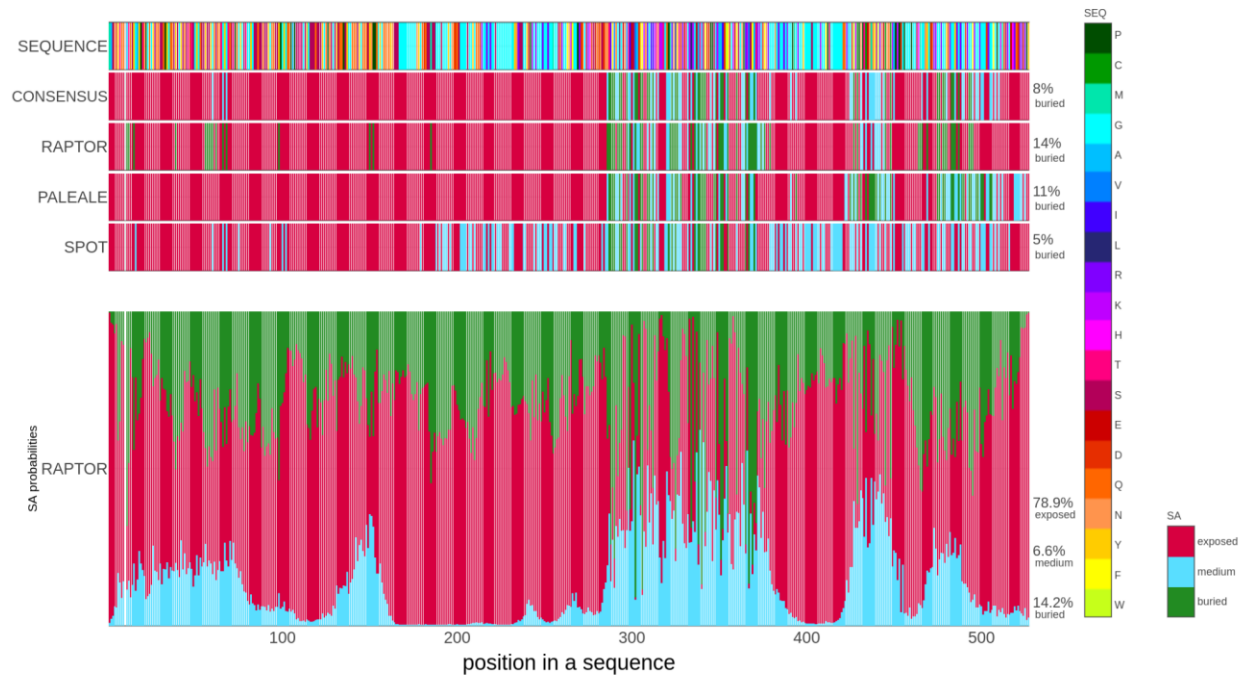

1.8 The Structural Disorder web app: [https://biapss.chem.iastate.edu/single\\_seq.html#disorder](https://biapss.chem.iastate.edu/single_seq.html#disorder)

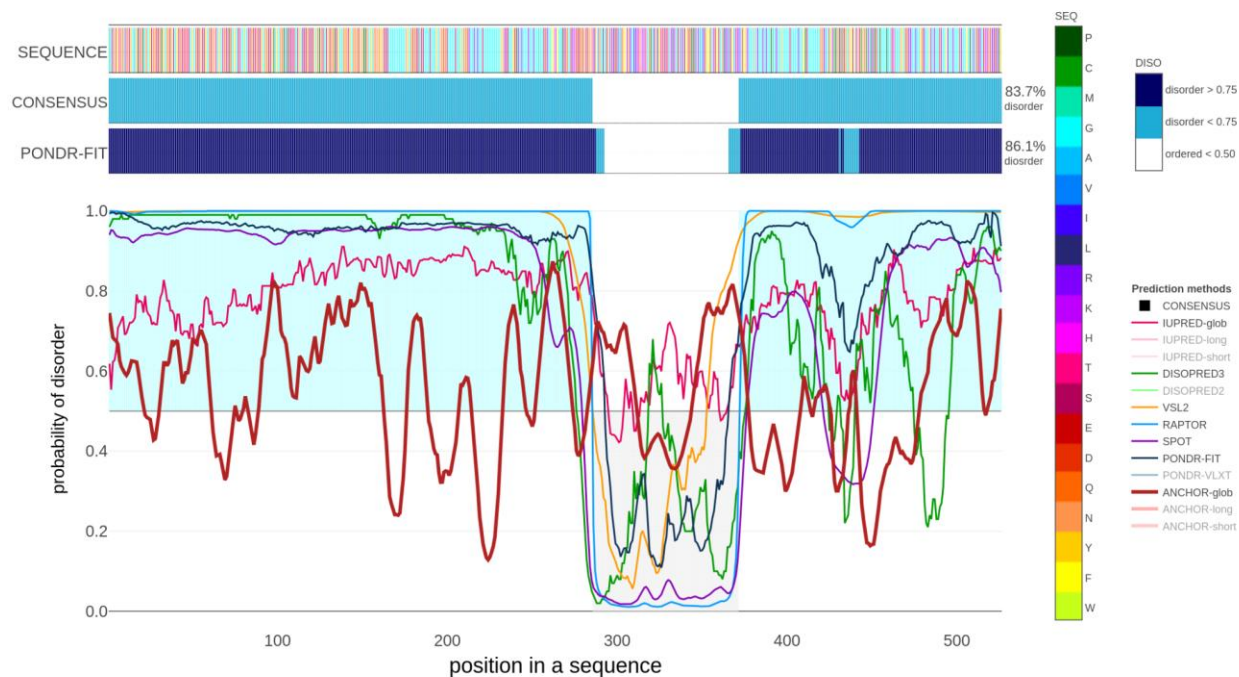



1.9 Contact Map web app: [https://biapss.chem.iastate.edu/single\\_seq.html#contacts](https://biapss.chem.iastate.edu/single_seq.html#contacts)

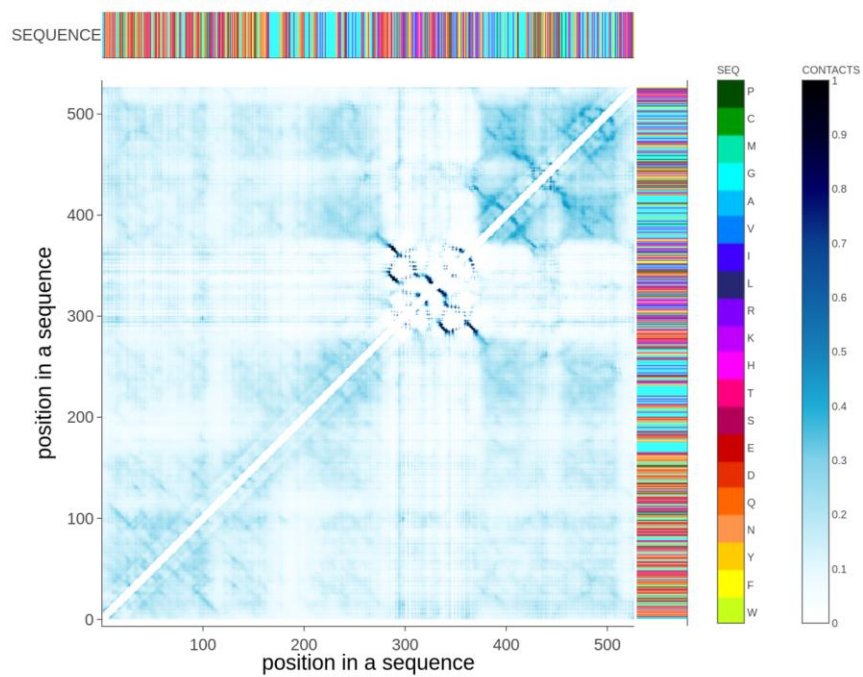

Supplement: s1 [file s1]
